# Supplementary material for: Benign role of Bi on an electrodeposited Cu2O semiconductor towards photo-assisted H2 generation from water
Source: Royal Society of Chemistry journal article supplement (doi:10.1039/c6ta03237k), 2016-01-01
Supplement: c6ta03237k1.pdf [file c6ta03237k1.pdf]

## **Supporting Information**

### **Benign Role of Bi on Electrodeposited Cu<sub>2</sub>O Semiconductor towards Photo-Assisted H<sub>2</sub> Generation from Water**

Sanjib Shyamal<sup>a</sup>, Paramita Hajra<sup>a</sup>, Harahari Mandal<sup>a</sup>, Aparajita Bera<sup>a</sup>, Debasis Sariket<sup>a</sup>,  
Ashis Kumar Satpati<sup>b</sup>, Sukumar Kundu<sup>c</sup> and Chinmoy Bhattacharya<sup>a\*</sup>

<sup>a</sup> *Department of Chemistry, Indian Institute of Engineering Science & Technology, (IEST), Shibpur, Howrah – 711103, West Bengal, INDIA*

<sup>b</sup> *Analytical Chemistry Division, Bhabha Atomic Research Centre, Trombay, Mumbai 400085, INDIA*

<sup>c</sup> *Department of Metallurgy & Materials Engineering, Indian Institute of Engineering Science & Technology, (IEST), Shibpur, Howrah – 711103, West Bengal, INDIA*

Email: cbhattacharya.besus@gmail.com

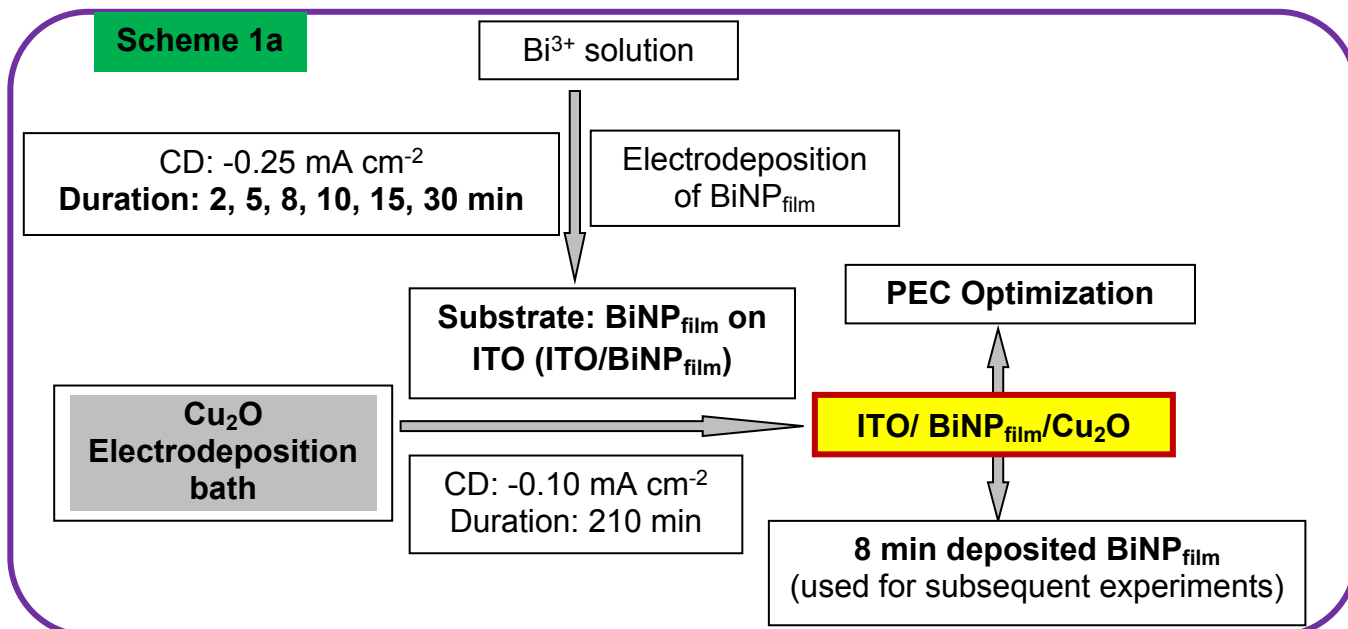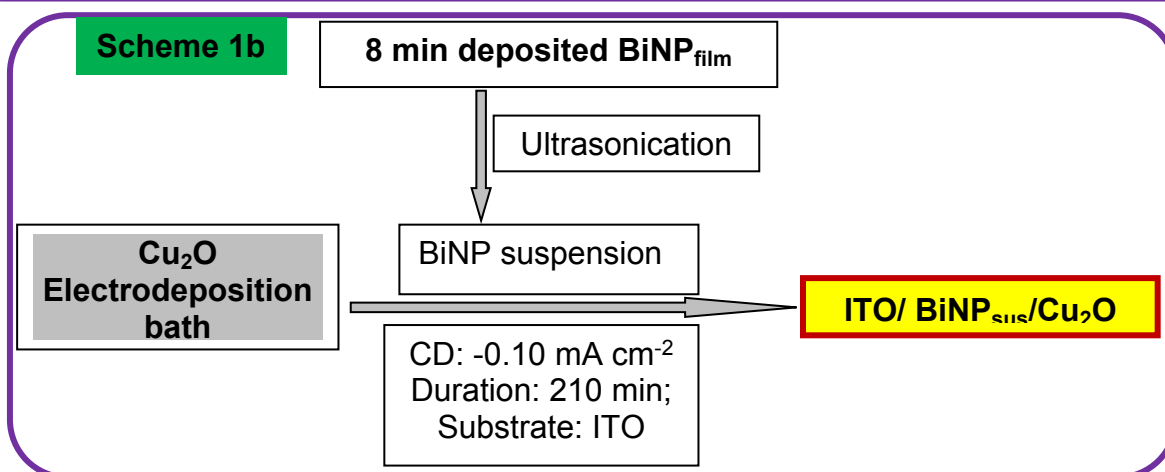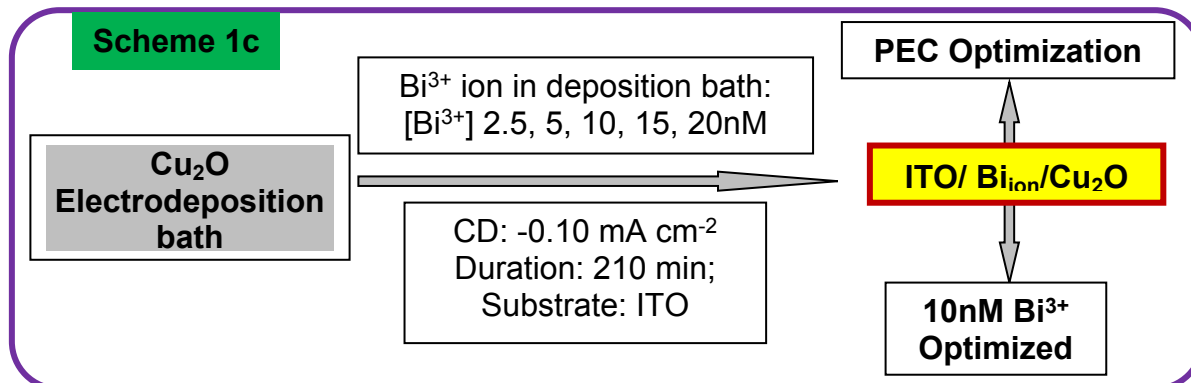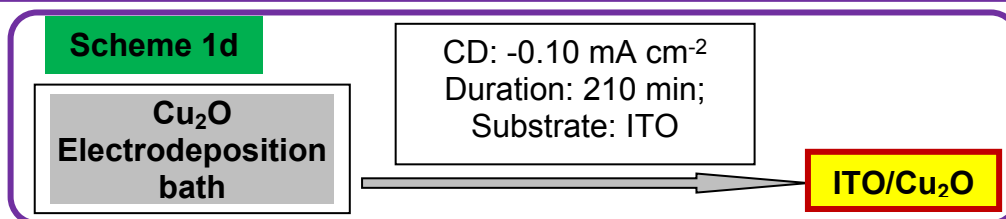

Scheme 1(a-d): Electrodeposition of Cu<sub>2</sub>O from different conditions.

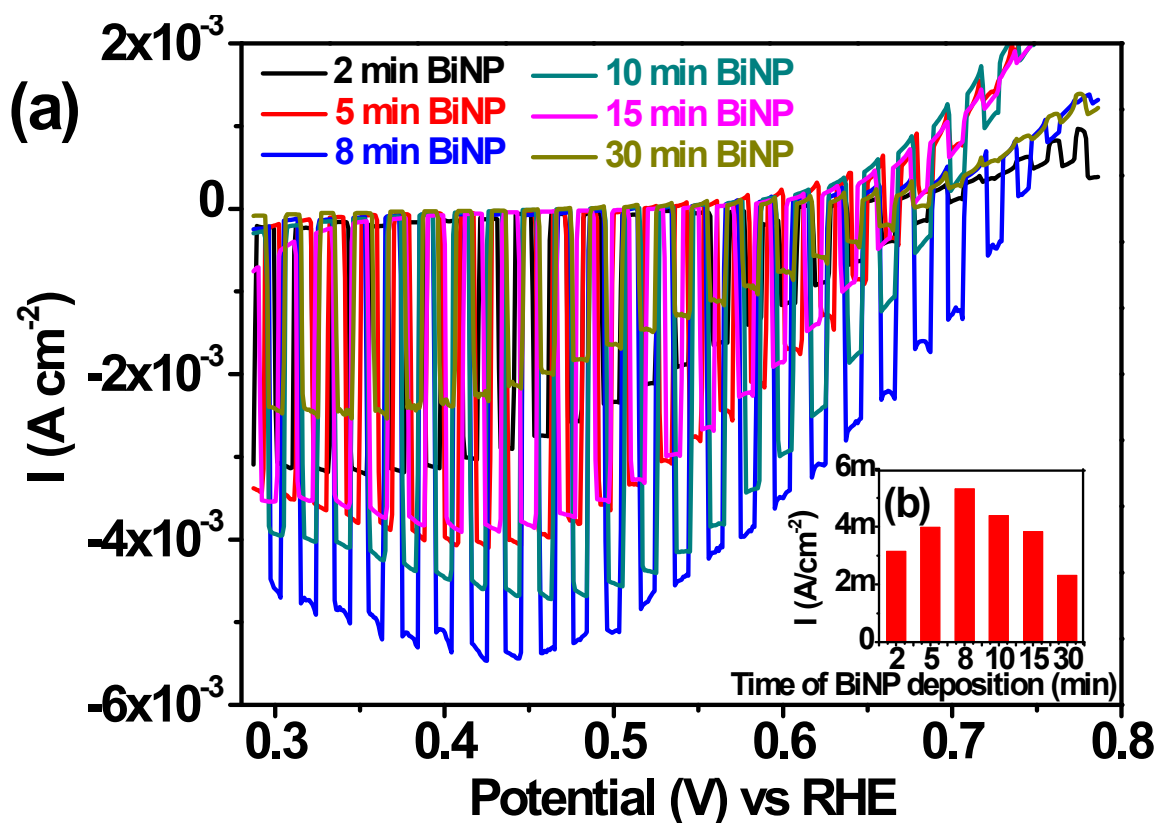

**Fig. S1. (a)** LSV plot in presence of 0.1 M  $\text{Na}_2\text{SO}_4$  electrolyte (pH 4.9) under chopped light illumination of  $35 \text{ mW cm}^{-2}$  at a scan rate of  $10 \text{ mV s}^{-1}$  for optimization of deposition time of BiNPs film followed by  $\text{Cu}_2\text{O}$  deposition; **(b, Bar plot)** Variation of photo-generated current densities measured at a potential of 0.4 V vs RHE.

The optimized deposition time for BiNP film is 8 min.  $\text{Cu}_2\text{O}$  film developed over this film shows maximum photocurrent in photoelectrochemical reduction of water under illumination.

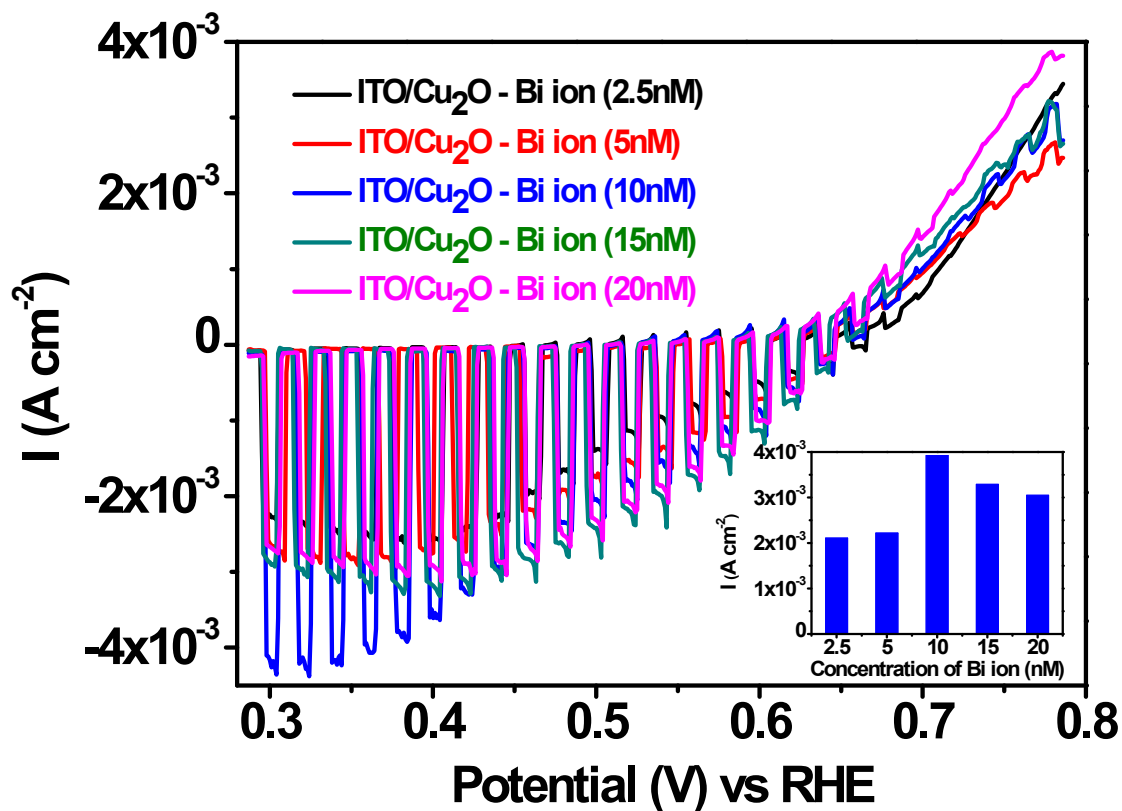

**Fig. S2. (a)** LSV plot in presence of 0.1 M Na<sub>2</sub>SO<sub>4</sub> electrolyte (pH 4.9) under chopped light illumination of 35 mW cm<sup>-2</sup> at a scan rate of 10mV s<sup>-1</sup> for optimization of Bi<sup>3+</sup> ions concentration in the Cu<sub>2</sub>O electrodeposition bath. **(b, Bar plot)** Variation of photo-generated current densities measured at a potential of 0.4 V vs RHE.

The optimized Bi<sup>3+</sup> ions concentration in Cu<sub>2</sub>O electrodeposition bath is 10nM. Cu<sub>2</sub>O film developed over this film shows maximum photocurrent in photoelectrochemical reduction of water under illumination.

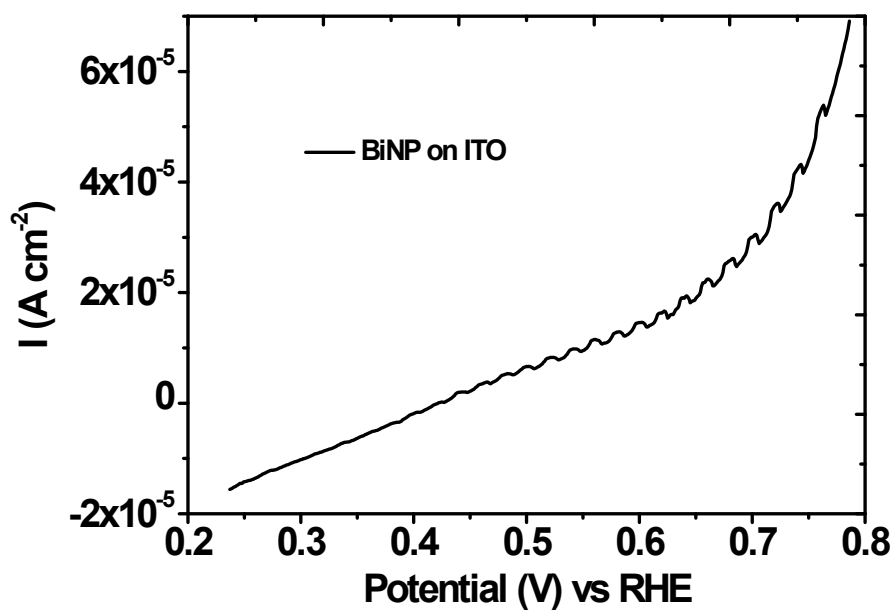

**Fig. S3.** LSV plot of BiNP on ITO in presence of 0.1 M Na<sub>2</sub>SO<sub>4</sub> electrolyte (pH 4.9) under chopped light illumination of 35 mW cm<sup>-2</sup> at a scan rate of 10mV s<sup>-1</sup>.

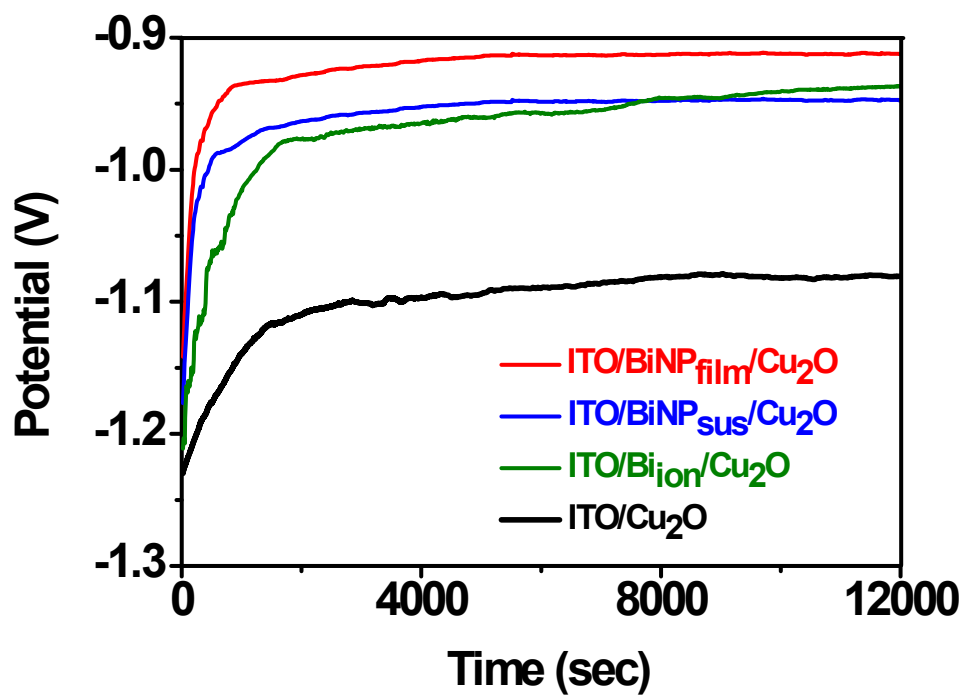

**Fig. S4.** Potential – Time curve during the deposition process of Cu<sub>2</sub>O in different condition.

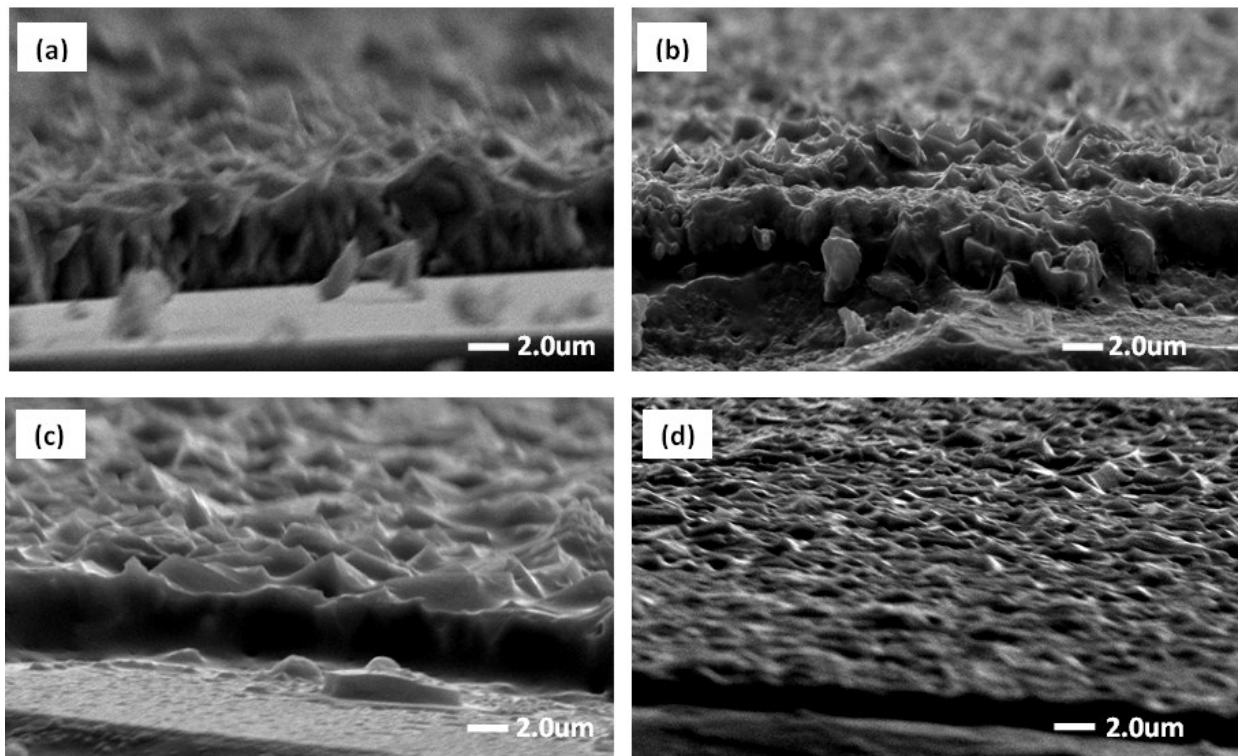

**Fig. S5.** Cross sectional SEM images of thin film semiconductor **(a)** ITO/BiNP<sub>film</sub>/Cu<sub>2</sub>O, **(b)** ITO/BiNP<sub>sus</sub>/Cu<sub>2</sub>O, **(c)** ITO/Bi<sub>ion</sub>/Cu<sub>2</sub>O, and **(d)** ITO/Cu<sub>2</sub>O.

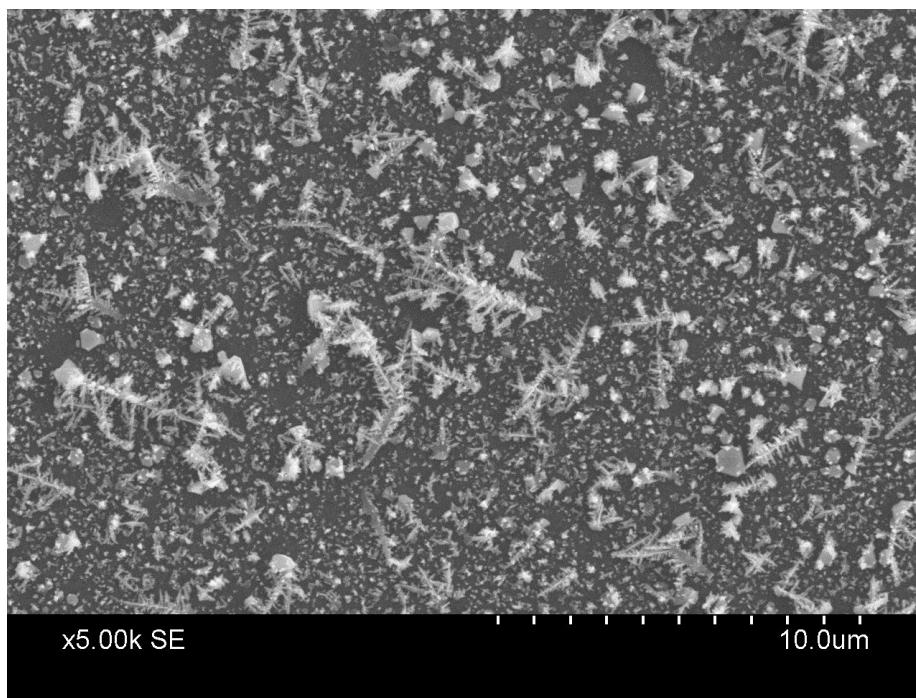

**Fig. S6.** SEM image of the BiNP film on ITO glass substrate.



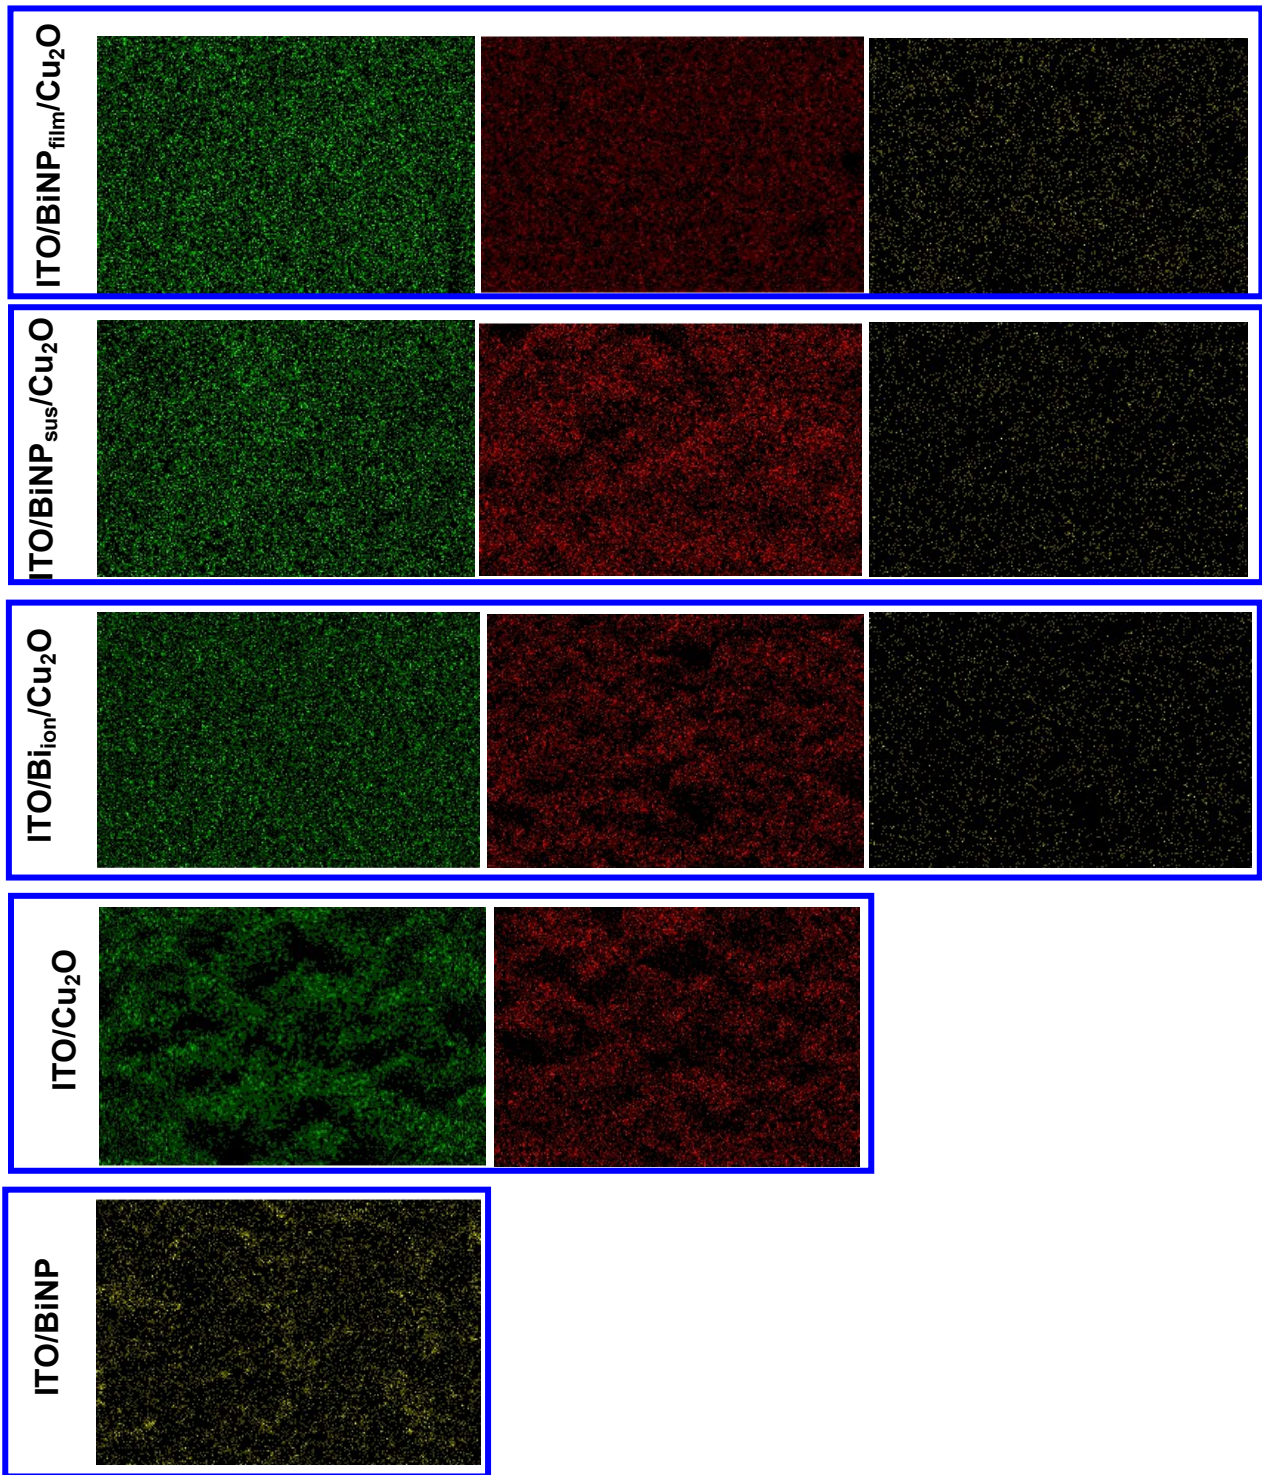

**Fig. S7.** Elemental mapping of Cu (Green), O (Red), and Bi (Yellow) obtained from different samples.

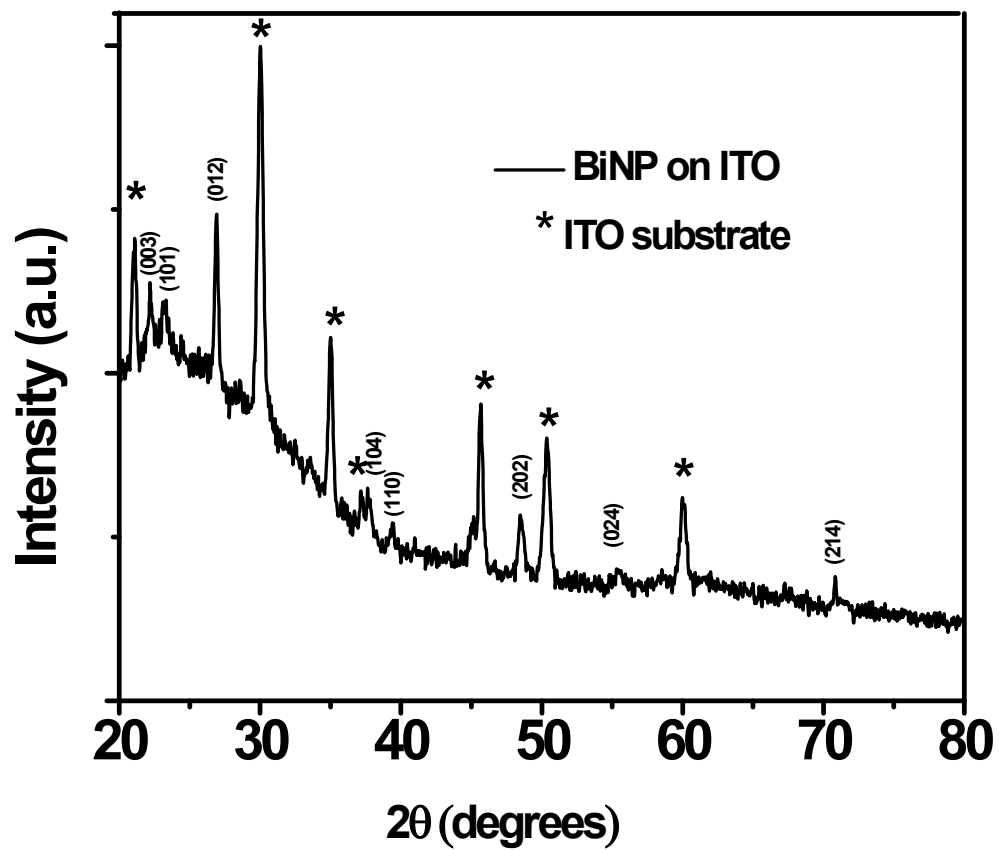

Fig. S8. XRD pattern of BiNP thin film on ITO substrate.

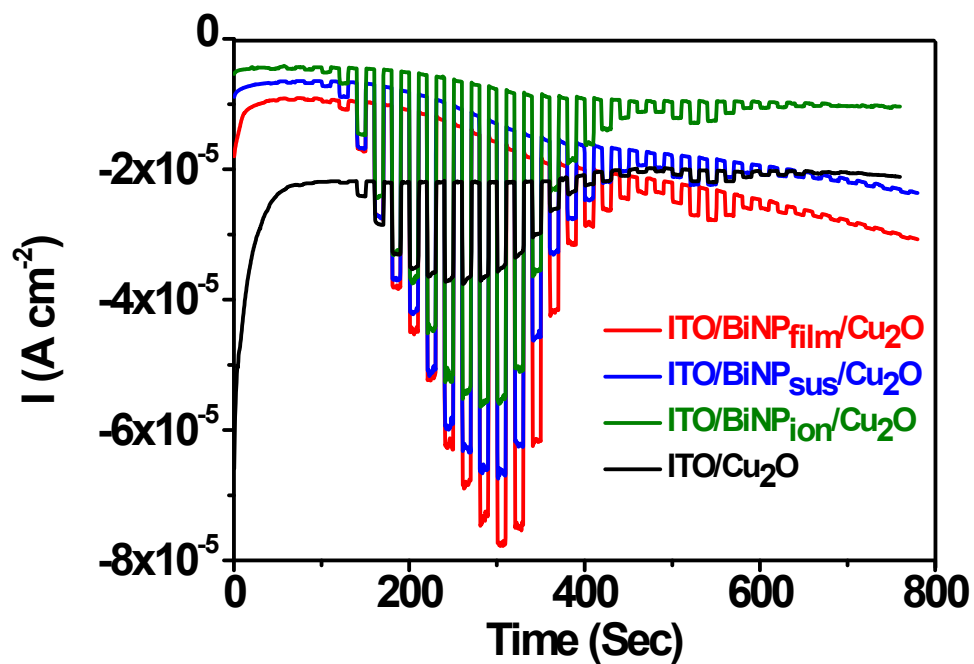

**Fig. S9.** Photoelectrochemical Action spectrum of Cu<sub>2</sub>O thin films on ITO substrates in presence of BiNPs and Bi ion using 0.1 M Na<sub>2</sub>SO<sub>4</sub> electrolyte (pH 4.9) at an applied potential of 0.4 V vs RHE.

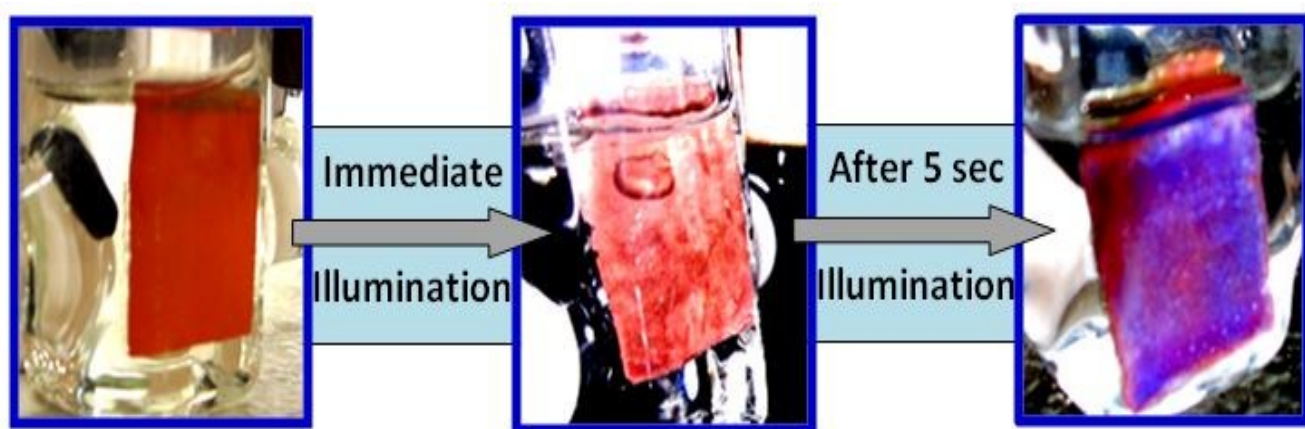

**Fig. S10.** Photoelectrochemical reduction of methyl viologen (sacrificial reagent)

[ $MV^{2+}_{\text{colorless}} \rightarrow MV^{+\bullet}_{\text{deep blue}}$ ] over ITO/BiNP<sub>film</sub>/Cu<sub>2</sub>O electrodes under illumination.

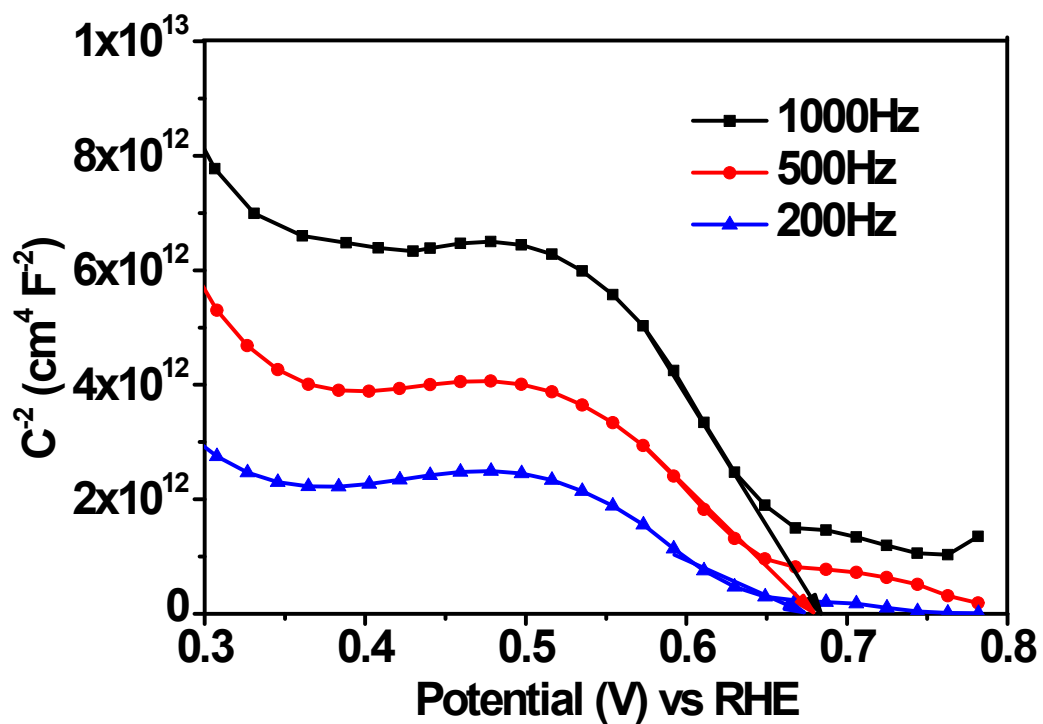

**Fig. S11.** Mott-Schottky plots of ITO/BiNP<sub>film</sub>/Cu<sub>2</sub>O sample in presence of 0.1 M Na<sub>2</sub>SO<sub>4</sub> electrolytes (pH 4.9) using an ac frequencies of 200, 500, and 1000 Hz.

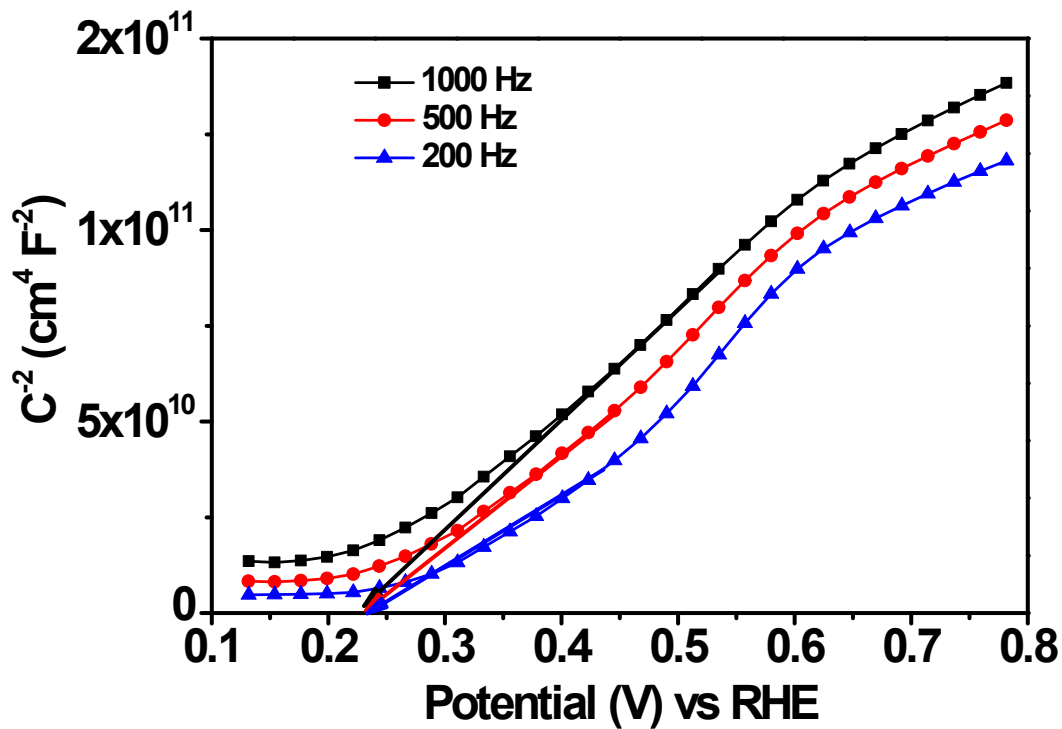

**Fig. S12.** Mott-Schottky plots of BiNP thin film on ITO in presence of 0.1 M  $\text{Na}_2\text{SO}_4$  electrolytes (pH 4.9) using an ac frequencies of 200, 500, and 1000 Hz.

**Table S1.** Variation of atomic percentage of the constituent elements in the Cu<sub>2</sub>O thin films developed in presence of BiNP and Bi<sup>3+</sup> ions.

| Sample description                          | Elements | Atomic% |
|---------------------------------------------|----------|---------|
| ITO/BiNP <sub>film</sub> /Cu <sub>2</sub> O | Cu       | 64.34   |
|                                             | O        | 35.43   |
|                                             | Bi       | 0.23    |
| ITO/BiNP <sub>sus</sub> /Cu <sub>2</sub> O  | Cu       | 64.23   |
|                                             | O        | 35.56   |
|                                             | Bi       | 0.21    |
| ITO/Bi <sub>ion</sub> /Cu <sub>2</sub> O    | Cu       | 65.49   |
|                                             | O        | 34.30   |
|                                             | Bi       | 0.21    |
| ITO/Cu <sub>2</sub> O                       | Cu       | 57.19   |
|                                             | O        | 42.81   |
| ITO/BiNP                                    | Bi       | 100     |

**Table S2.** Variation of equivalent circuit (EC) parameters of the Cu<sub>2</sub>O thin films developed in presence of BiNP and Bi<sup>3+</sup> ions.

| Sample                                      | R <sub>s</sub> (Ω) | R <sub>ct</sub> (Ω) | C <sub>ct</sub> (F)    | Error                   |
|---------------------------------------------|--------------------|---------------------|------------------------|-------------------------|
| ITO/BiNP <sub>film</sub> /Cu <sub>2</sub> O | 73.28              | 30.61               | 2.4 × 10 <sup>-4</sup> | 1.51 × 10 <sup>-9</sup> |
| ITO/BiNP <sub>sus</sub> /Cu <sub>2</sub> O  | 81.14              | 56.68               | 9.6 × 10 <sup>-5</sup> | 1.60 × 10 <sup>-9</sup> |
| ITO/Bi <sub>ion</sub> /Cu <sub>2</sub> O    | 86.43              | 78.84               | 8.7 × 10 <sup>-5</sup> | 1.52 × 10 <sup>-9</sup> |
| ITO/Cu <sub>2</sub> O                       | 91.73              | 128.7               | 2.3 × 10 <sup>-5</sup> | 4.64 × 10 <sup>-9</sup> |

**Table S.3.:** Comparison of photoelectrochemical reduction of water over Cu<sub>2</sub>O thin film on conducting glass substrates prepared under different deposition conditions, as available in literature to that with the as prepared Cu<sub>2</sub>O, demonstrated in the present report.

| Sl. No | References                                                                                                                                                      | Substrates                                             | Cu <sub>2</sub> O synthesized through     | Electrolyte for characterization                    | Light intensity used    | Maximum photocurrent density obtained for H <sub>2</sub> O → H <sub>2</sub> reaction                        |
|--------|-----------------------------------------------------------------------------------------------------------------------------------------------------------------|--------------------------------------------------------|-------------------------------------------|-----------------------------------------------------|-------------------------|-------------------------------------------------------------------------------------------------------------|
| 01     | <b>Present work:</b><br>Cu <sub>2</sub> O film developed in presence of<br><b>(a) BiNP film</b><br><b>(b) BiNP suspension</b><br><b>(c) Bi<sup>3+</sup> ion</b> | ITO glass                                              | Electrodeposition                         | 0.1 (M) Na <sub>2</sub> SO <sub>4</sub> at pH ~ 4.9 | 35 mW cm <sup>-2</sup>  | <b>a) -5.2 mA cm<sup>-2</sup></b><br><b>b) -4.9 mA cm<sup>-2</sup></b><br><b>c) -3.7 mA cm<sup>-2</sup></b> |
| 02     | J. Phys. Chem. C, 2012, 116, 7341–7350                                                                                                                          | 100 nm Au and 10 nm Cr adhesion layer coated FTO glass | Electrodeposition                         | 1.0 (M) Na <sub>2</sub> SO <sub>4</sub> at pH ~ 4.9 | 100 mW cm <sup>-2</sup> | -2.4 mA cm <sup>-2</sup>                                                                                    |
| 03     | J. Mater. Chem., 2012, 22, 2456–2464                                                                                                                            | Cu coated ITO glass                                    | Electrodeposition followed by anodization | 0.5(M) Na <sub>2</sub> SO <sub>4</sub> at pH ~ 6.82 | 100 mW cm <sup>-2</sup> | -0.37 mA cm <sup>-2</sup>                                                                                   |
| 04     | Int. Journal of Hydrogen Energy, 2008, 33,2897 – 2903                                                                                                           | ITO glass                                              | Electrodeposition                         | 0.5 (M) Na <sub>2</sub> SO <sub>4</sub>             | 50 mW cm <sup>-2</sup>  | -0.025 mA cm <sup>-2</sup>                                                                                  |
| 05     | Electrochimica Acta, 2012, 62, 1– 7                                                                                                                             | FTO glass                                              | Electrodeposition                         | 0.1 (M) Na <sub>2</sub> SO <sub>4</sub>             | 100 mW cm <sup>-2</sup> | -0.06 mA cm <sup>-2</sup>                                                                                   |
| 06     | <i>ACS Appl. Mater. Interfaces</i> , 2015, 7, 18344–18352                                                                                                       | ITO Glass                                              | Electrodeposition                         | 0.1 (M) Na <sub>2</sub> SO <sub>4</sub> at pH ~ 4.9 | 35 mW cm <sup>-2</sup>  | -2.6 mA cm <sup>-2</sup>                                                                                    |
